# Supplementary material for: Epicoccarines A, B and epipyridone: tetramic acids and pyridone alkaloids from an Epicoccum sp. associated with the tree fungus Pholiota squarrosa
Source: Royal Society of Chemistry journal article supplement (doi:10.1039/b702378b), 2007-01-01

# Epicoccarine A <sup>1</sup>H NMR spectrum (CDCl<sub>3</sub>)

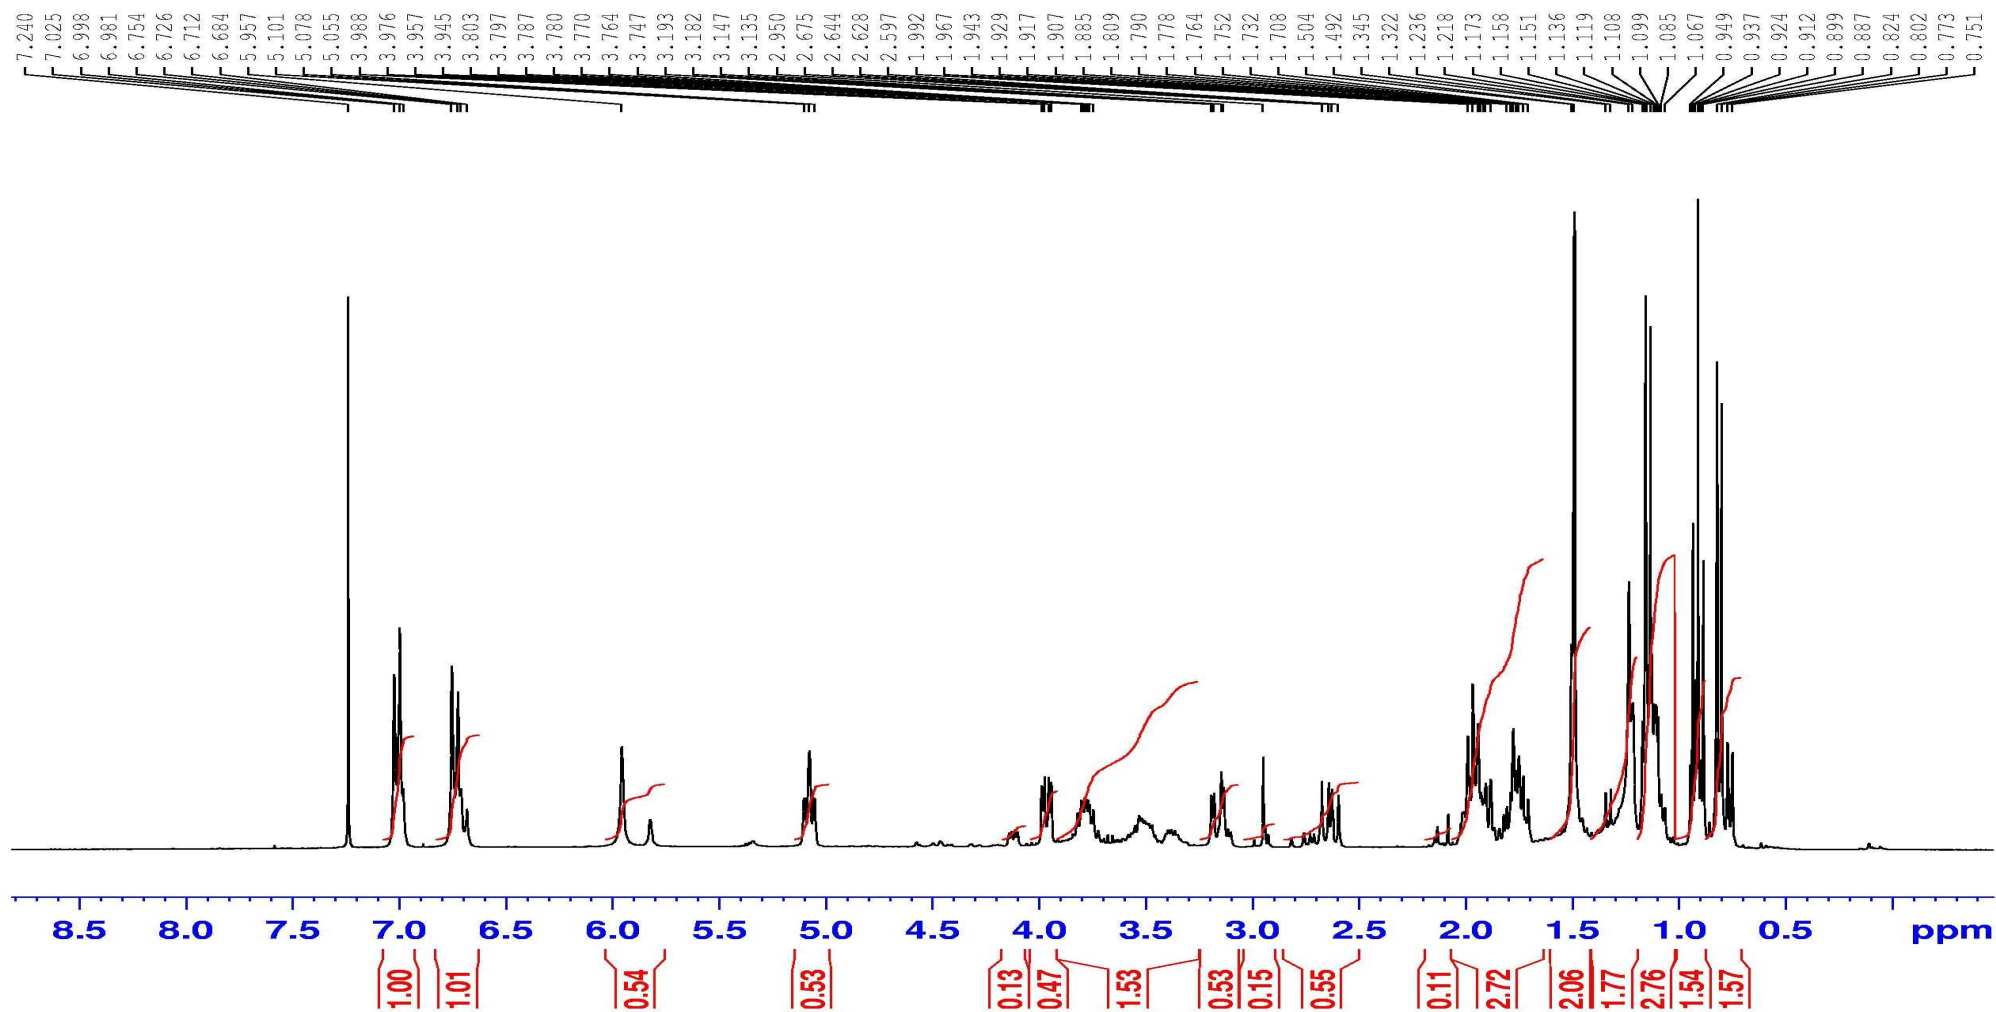

# Epicoccarine A $^{13}\text{C}$ NMR spectrum ( $\text{CDCl}_3$ )

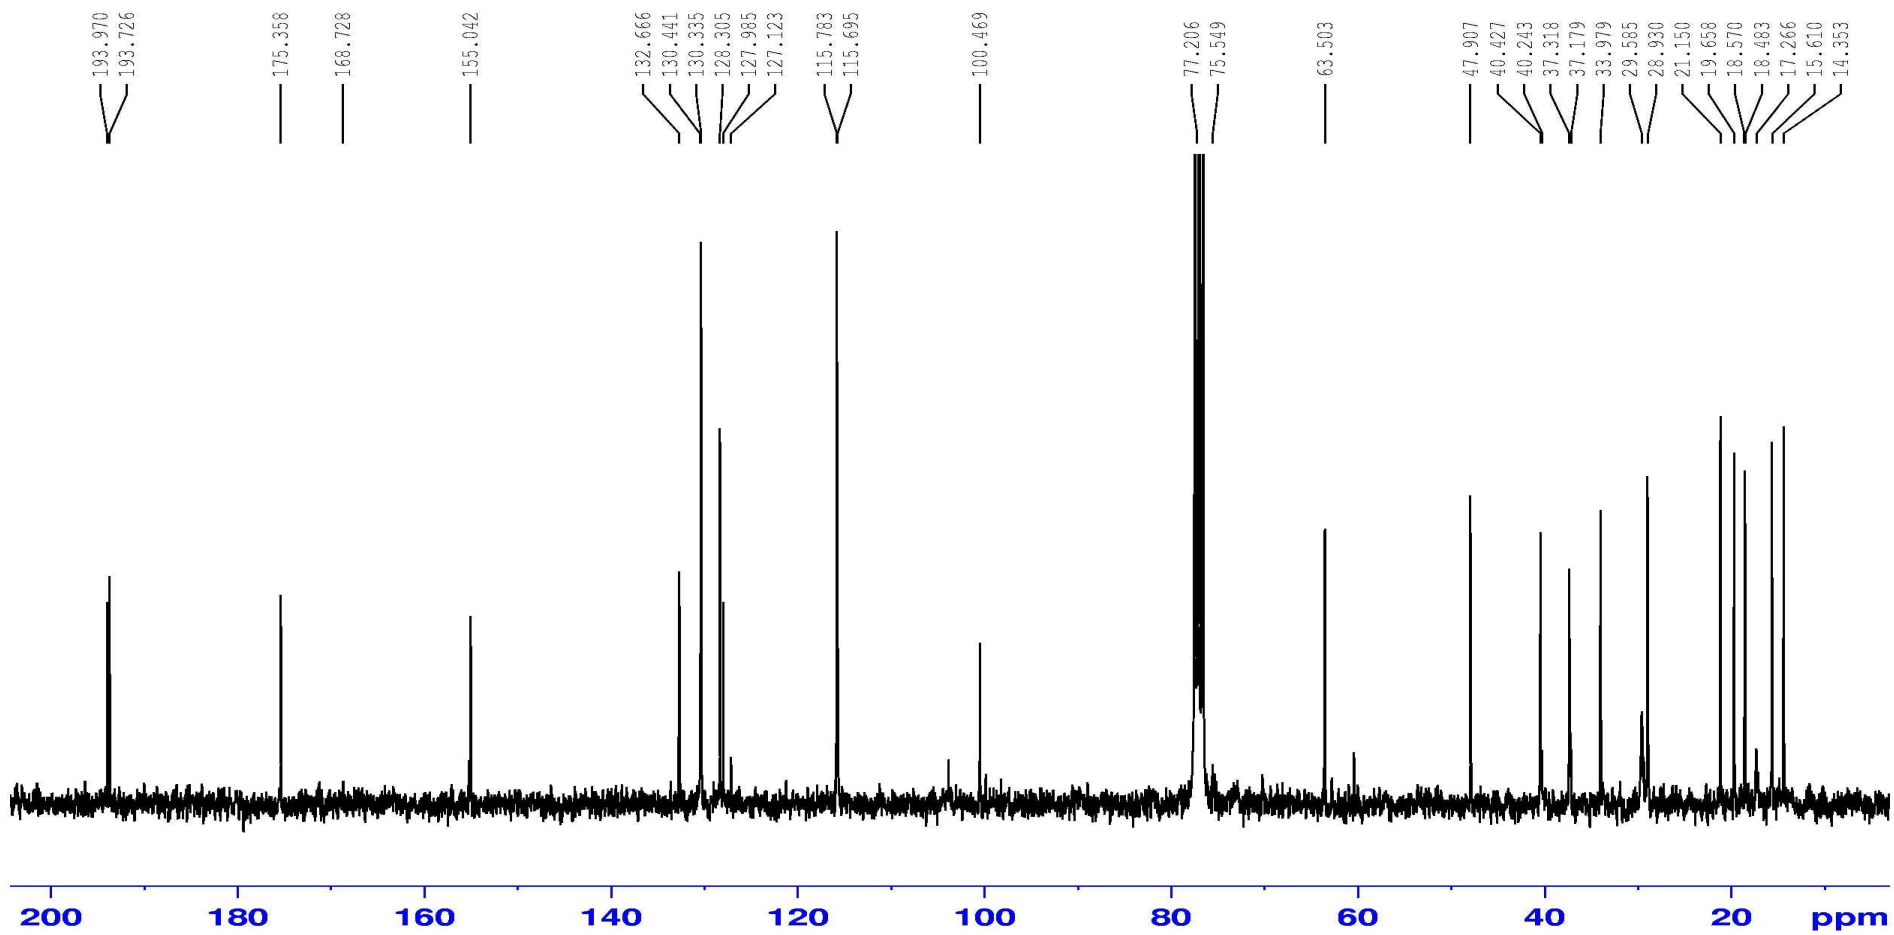

# Epicoccarine A HMBC spectrum (CDCl<sub>3</sub>)

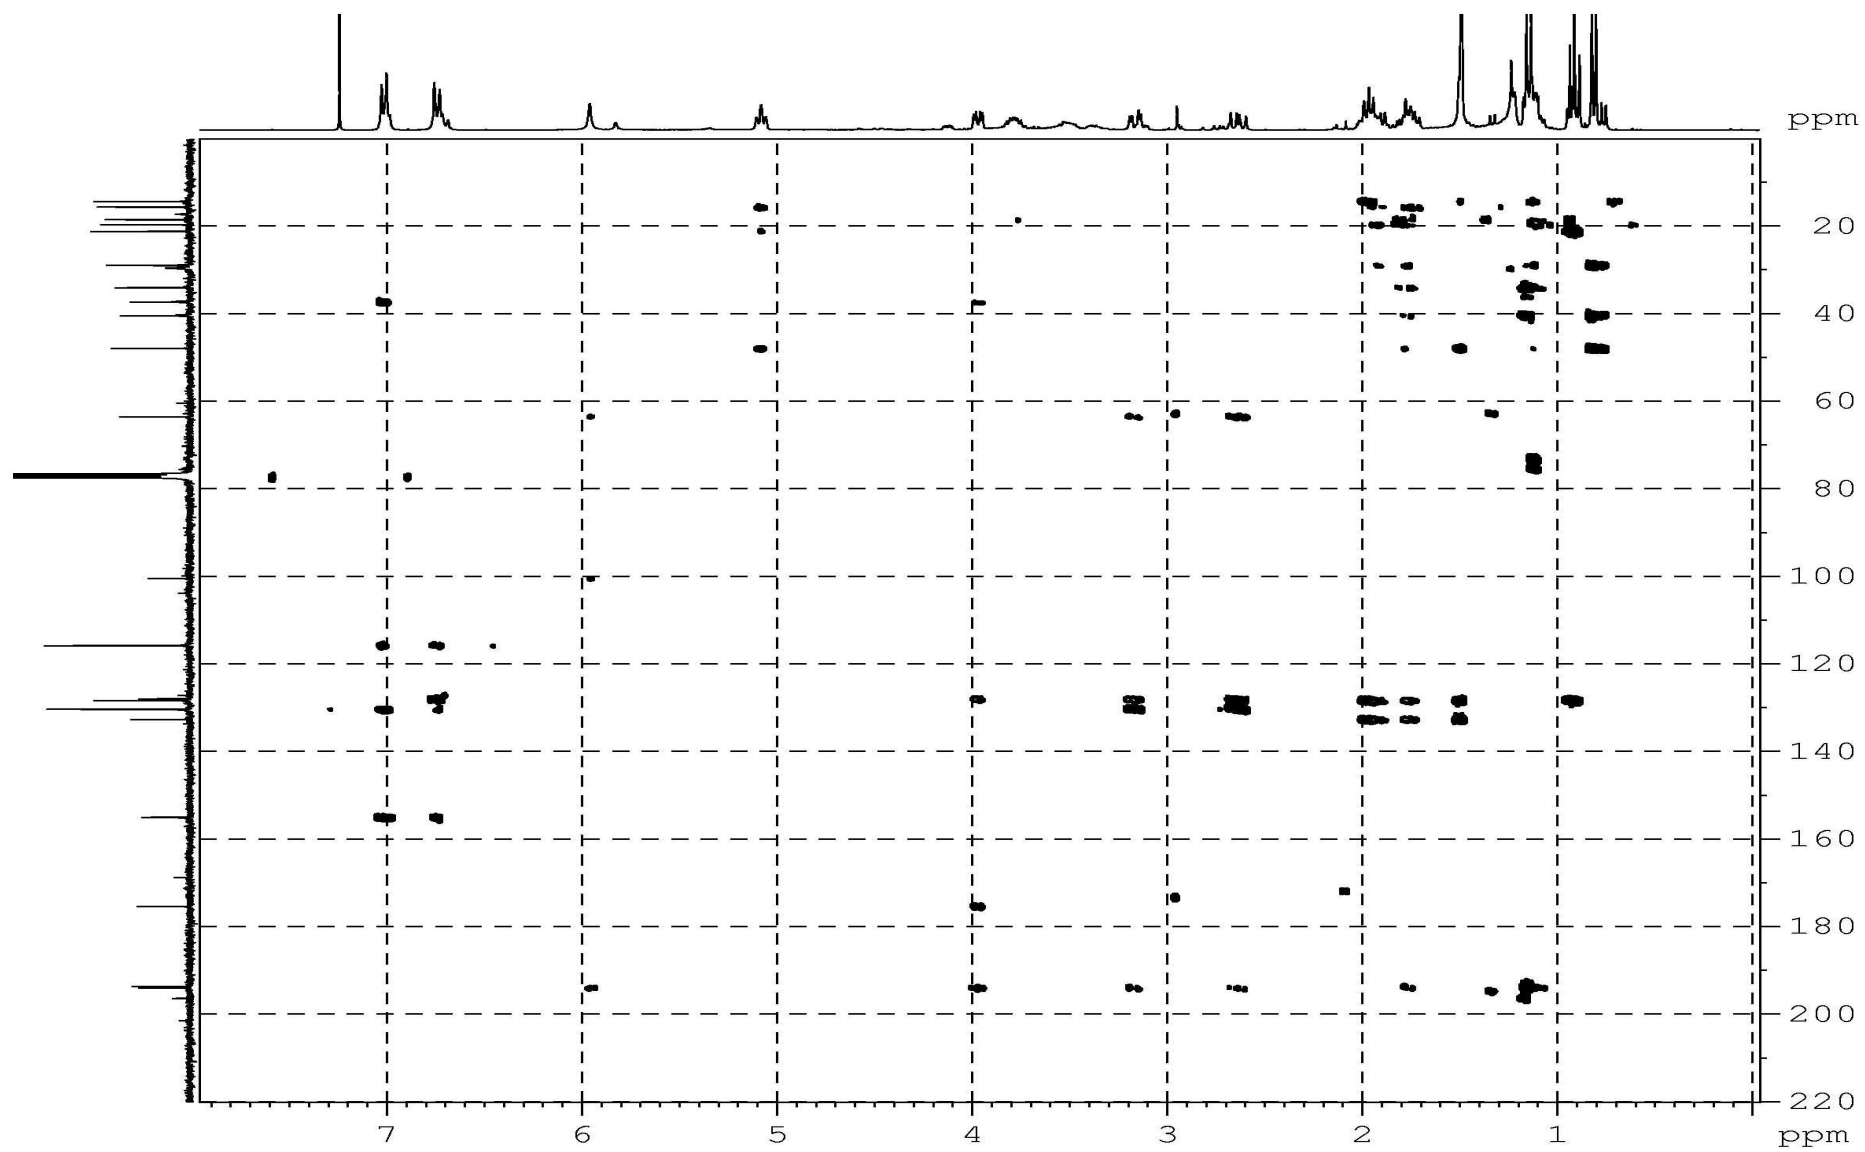

# Epicoccarine B $^1\text{H}$ NMR spectrum ( $\text{CDCl}_3$ )

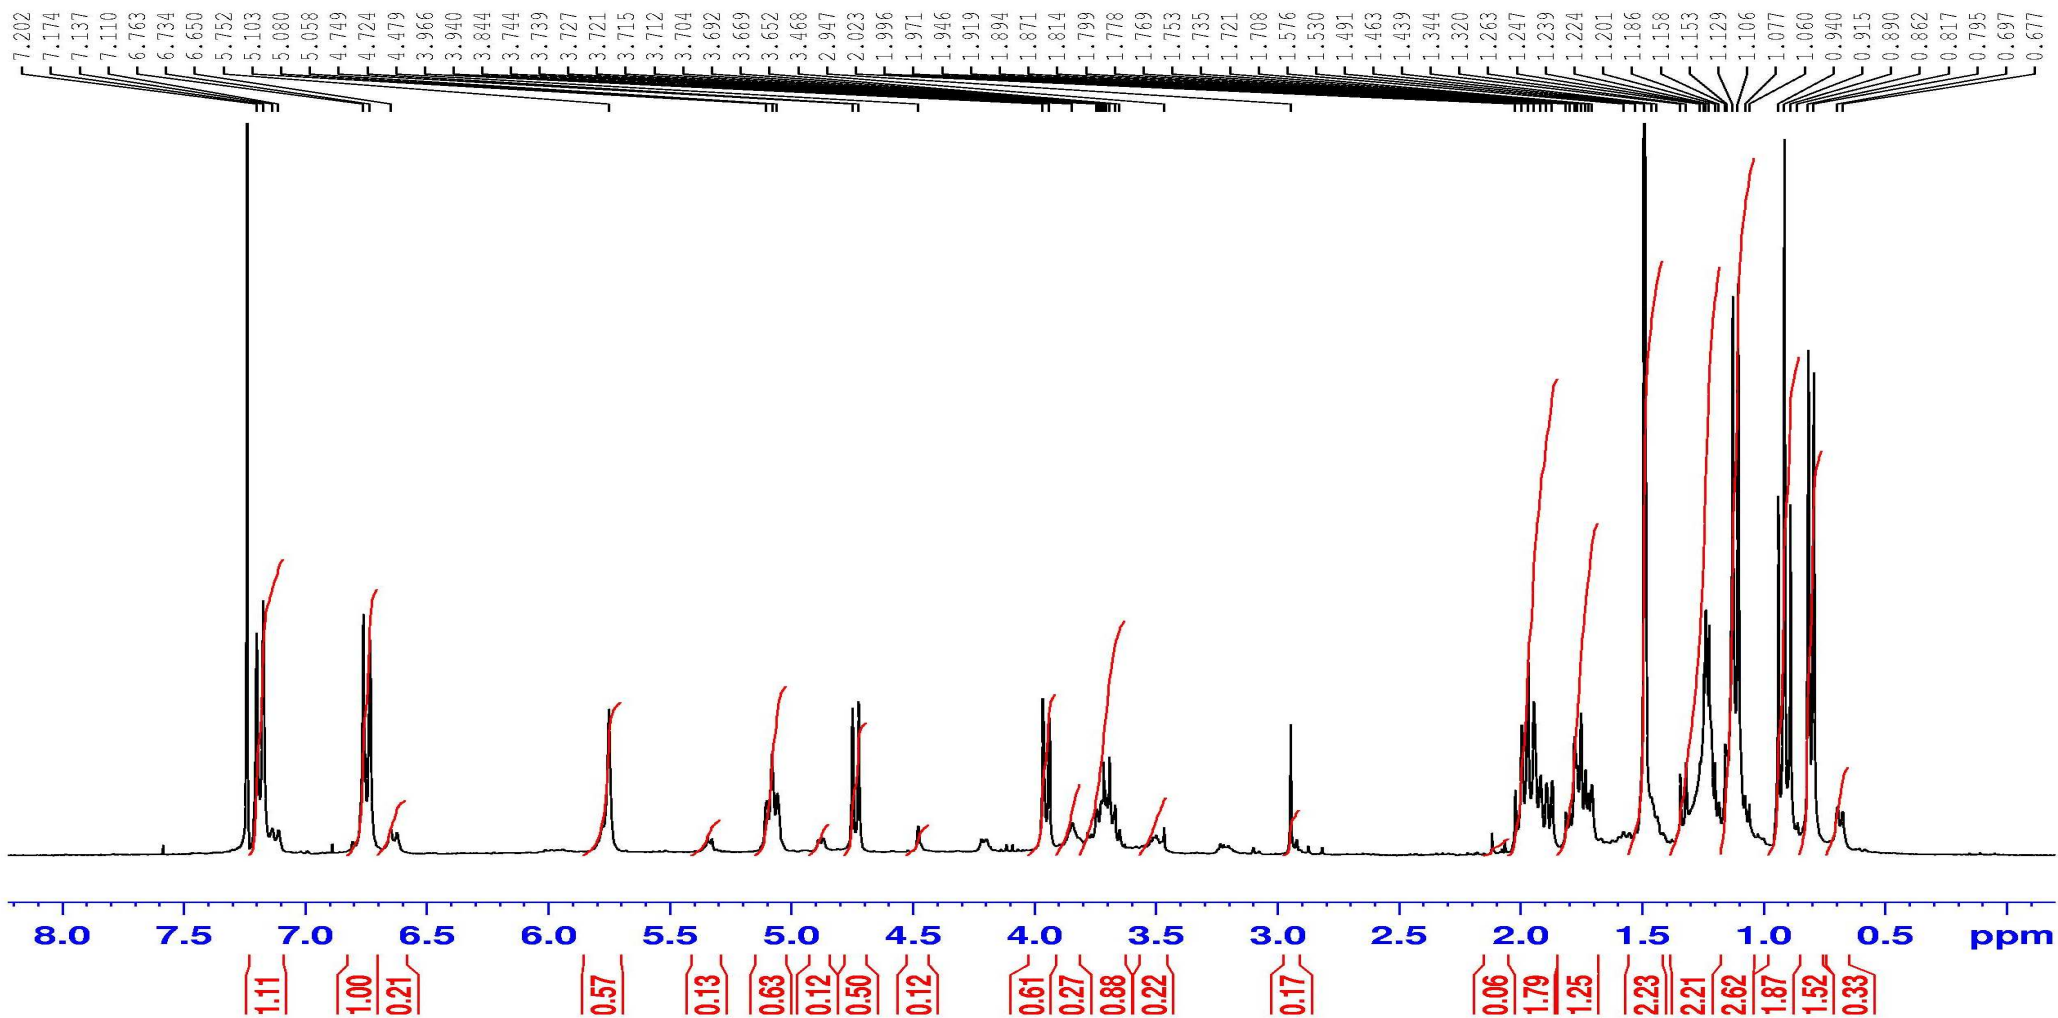

# Epicoccarine B $^{13}\text{C}$ NMR spectrum ( $\text{CDCl}_3$ )

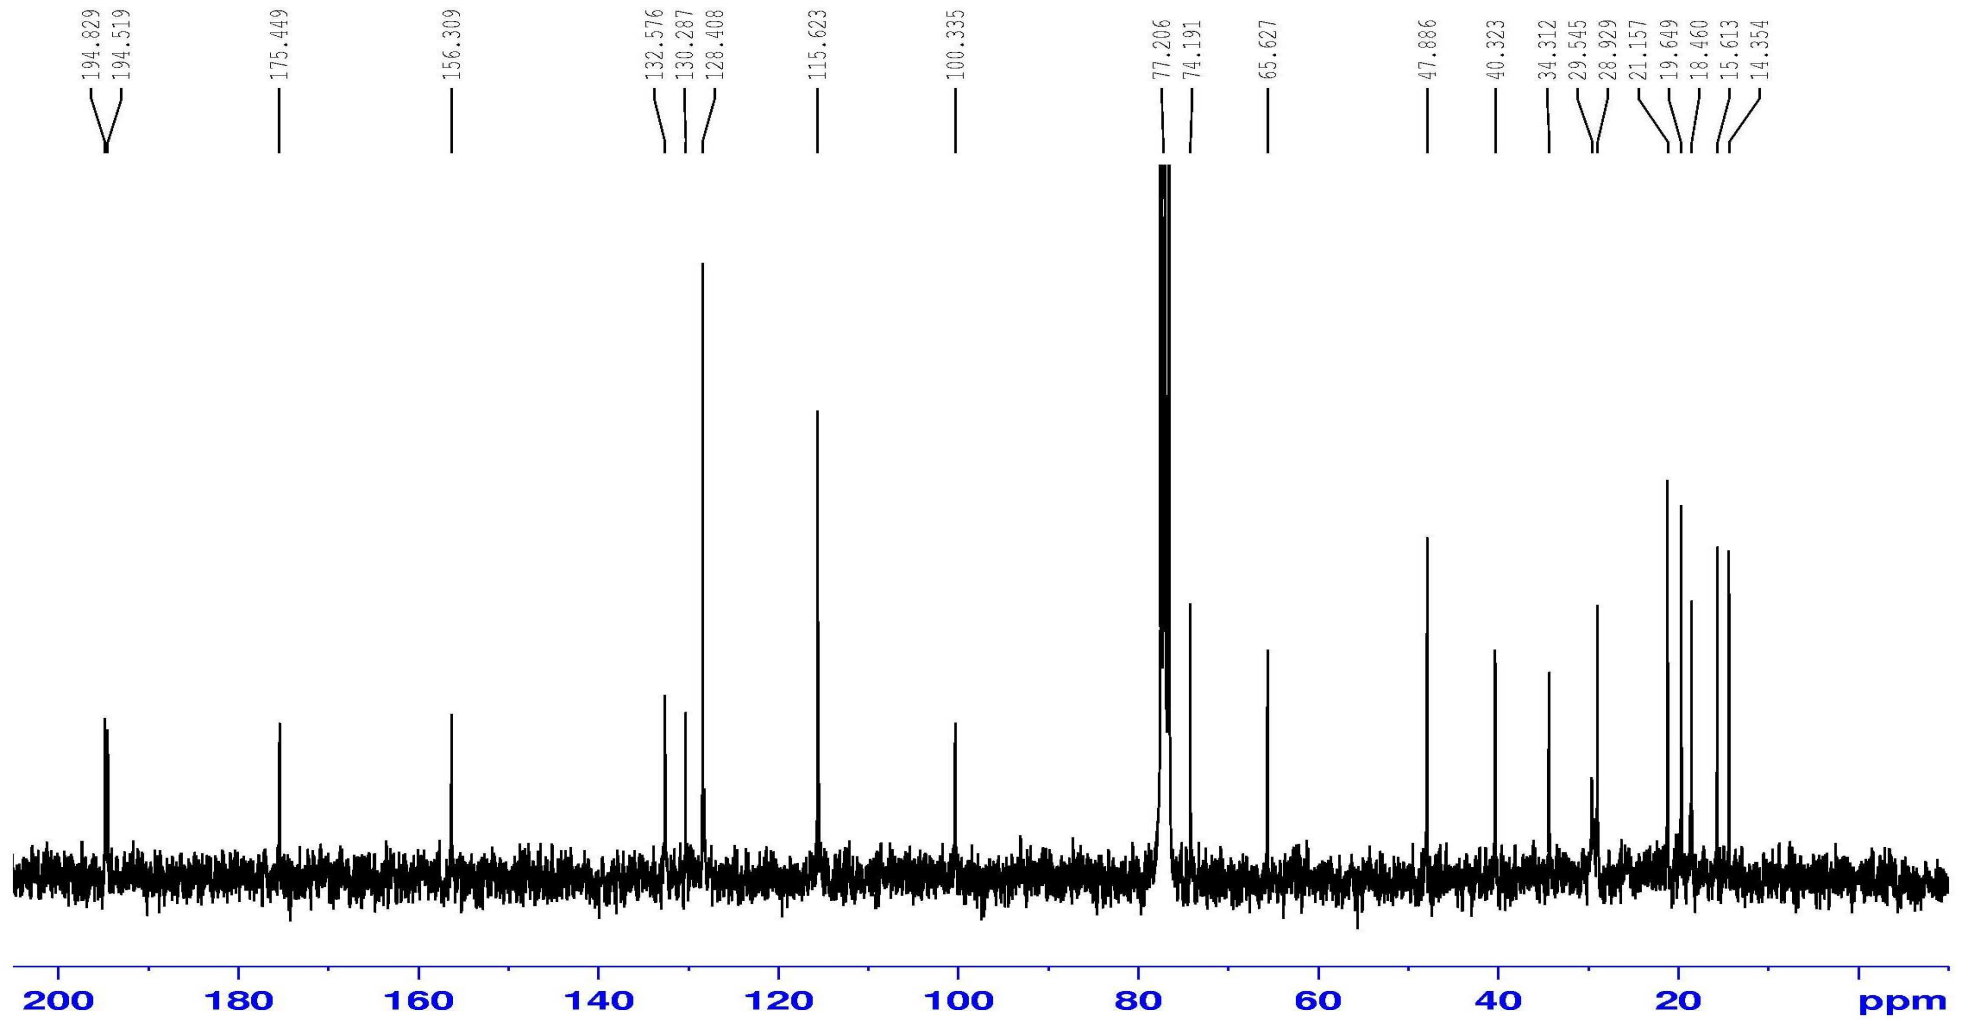

# Epipyridone <sup>1</sup>H NMR spectrum (CDCl<sub>3</sub>)

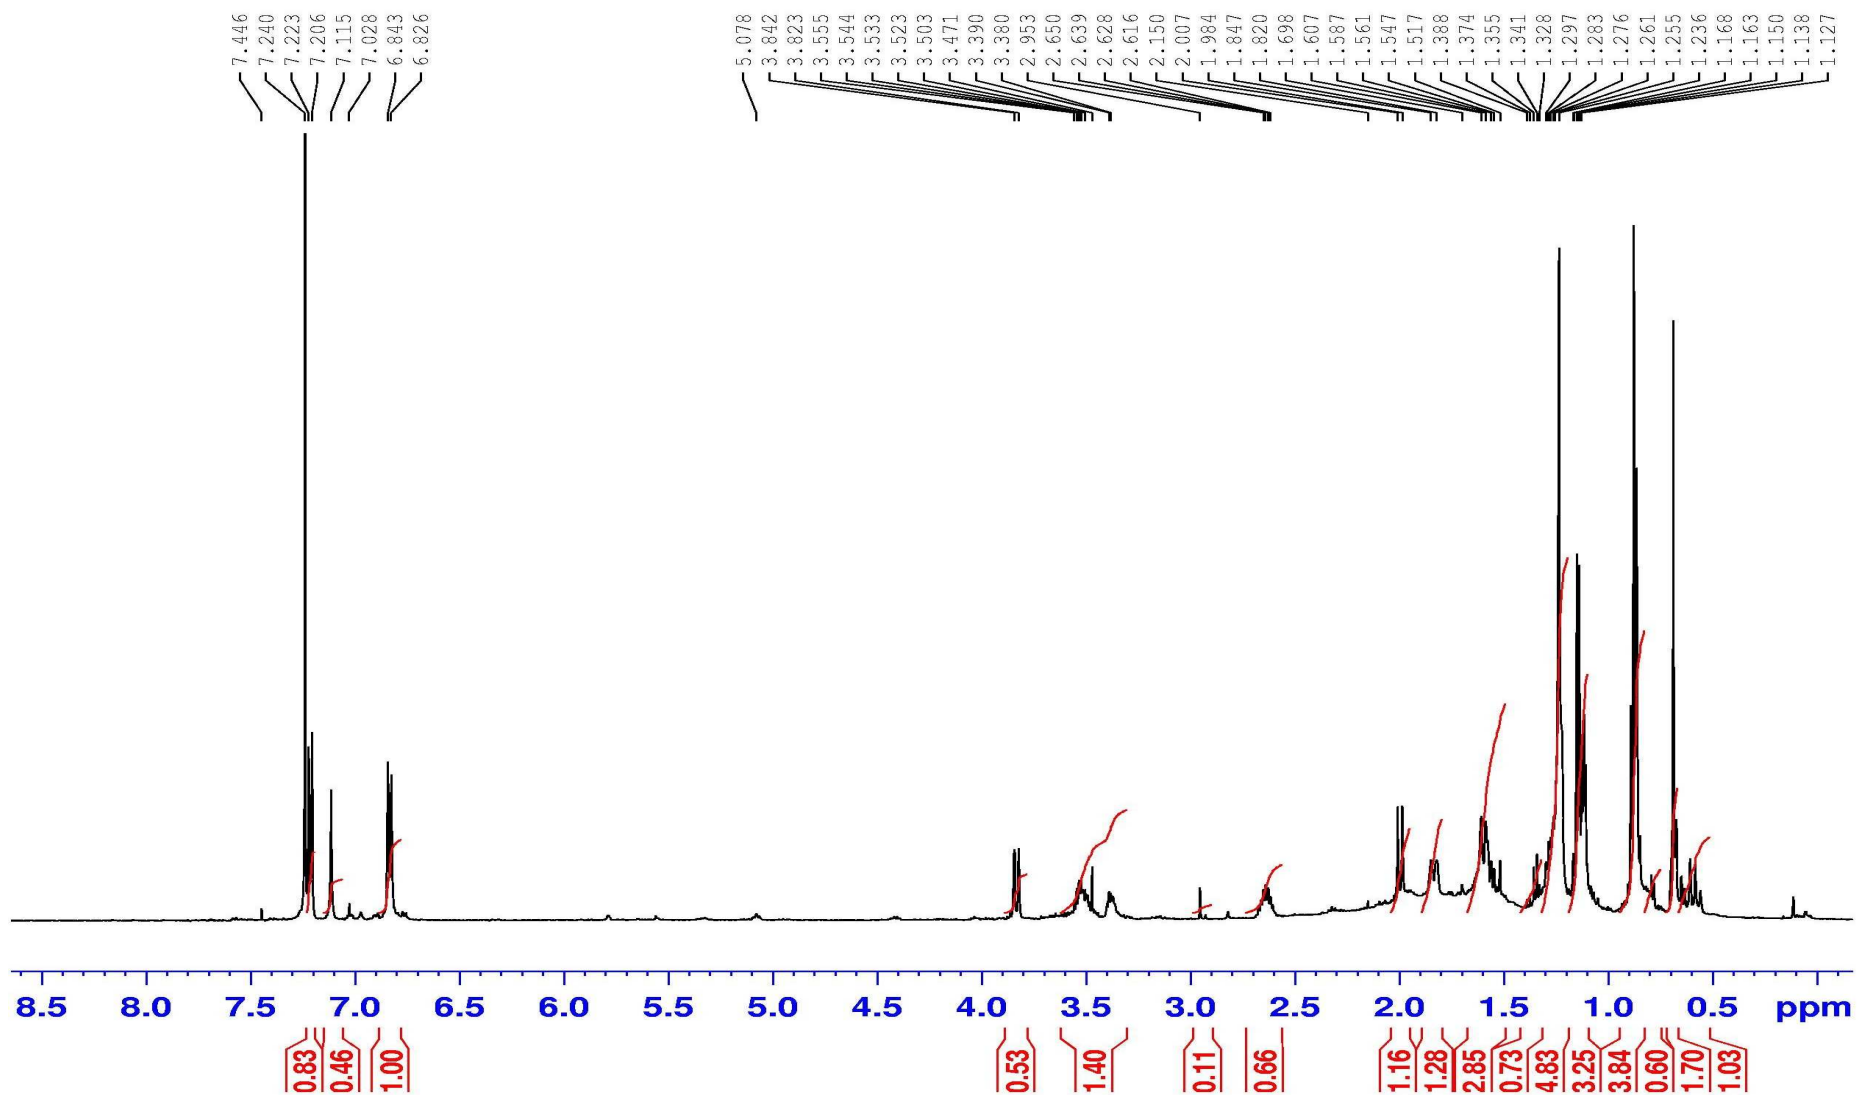

# Epipyridone HMBC spectrum (CDCl<sub>3</sub>)

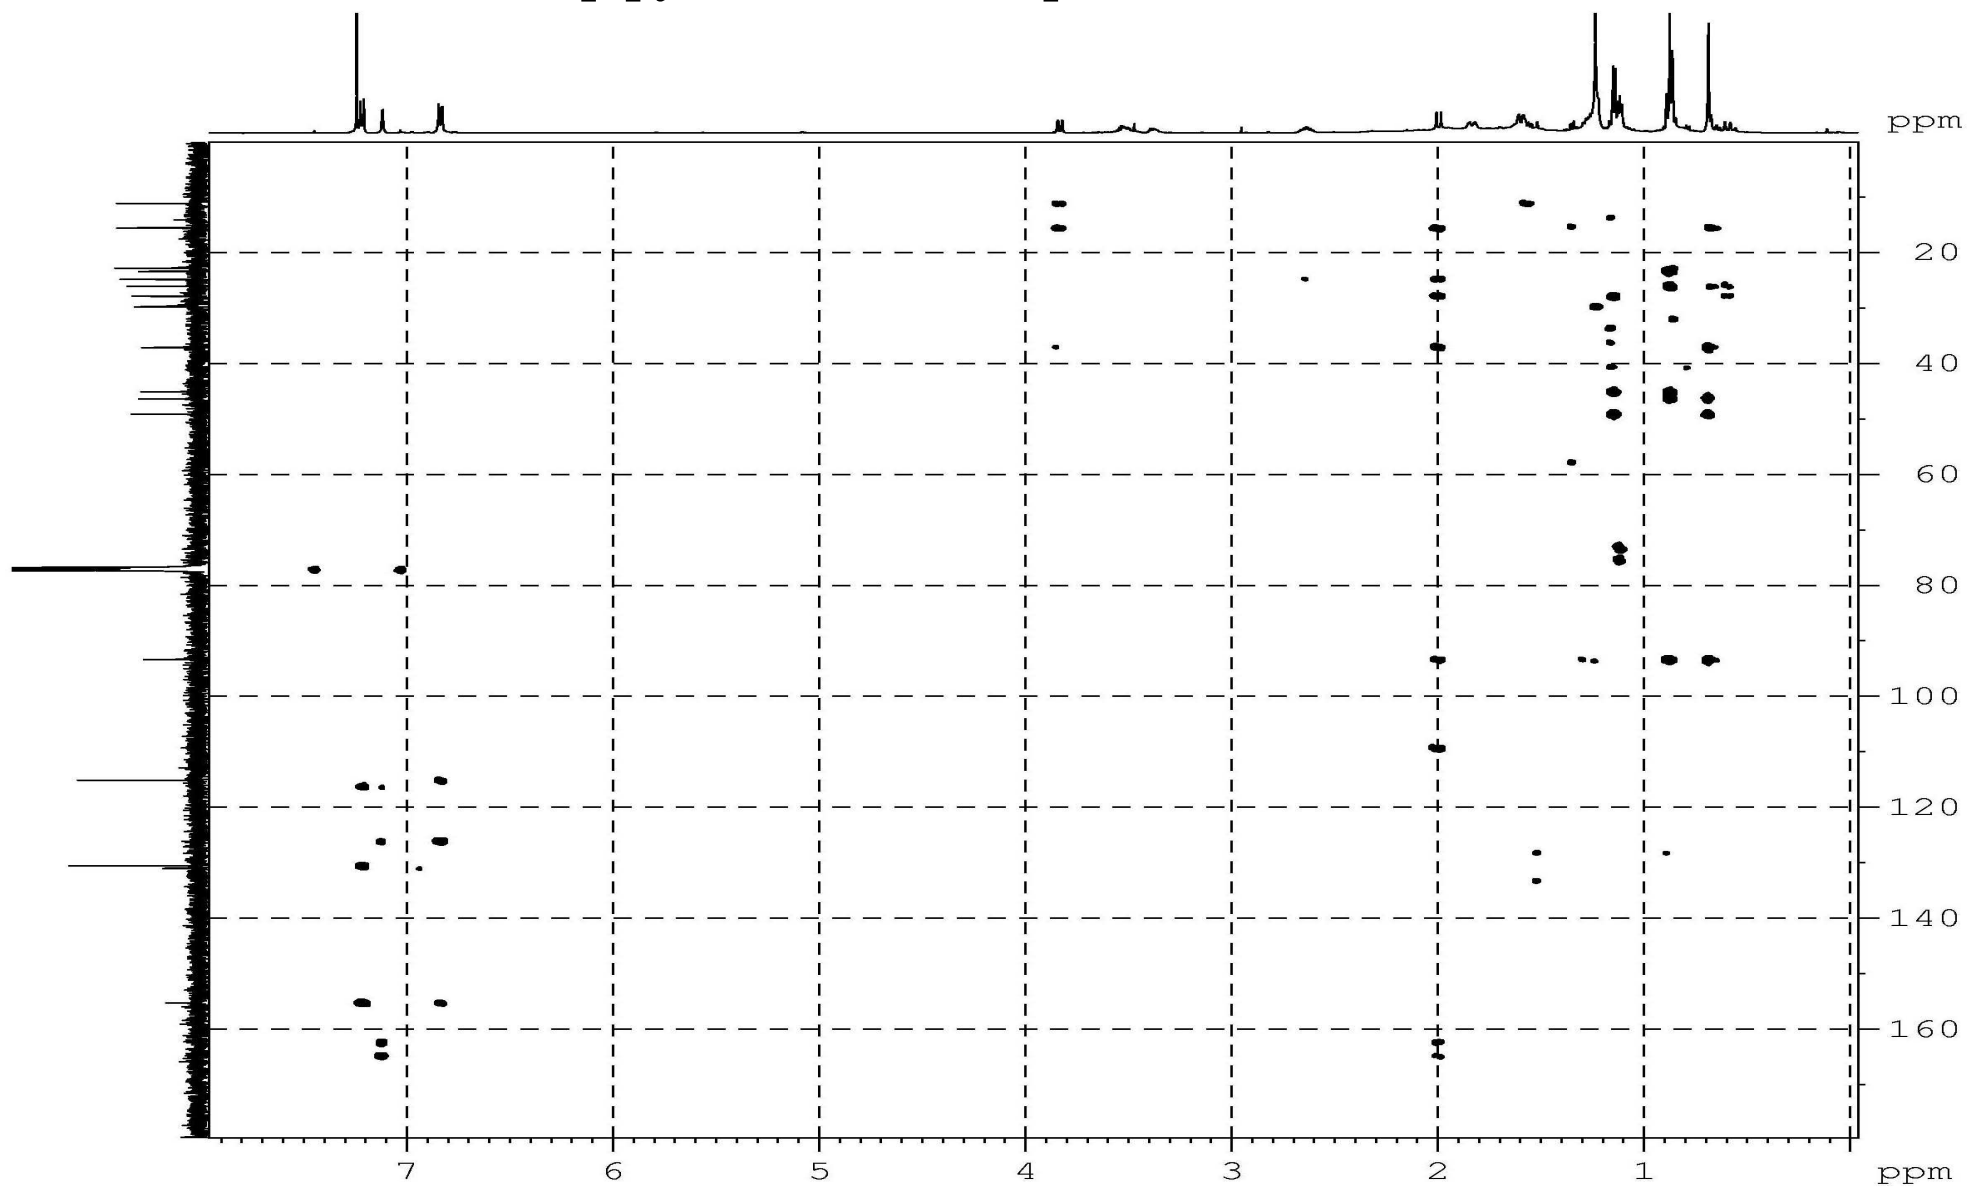

Supplement: b702378b-2.pdf [file b702378b-2.pdf]
